# Supplementary material
Source: Springer Nature journal article supplement (https://www.springermedizin.de/resource/supplementary/40169_2013_42_MOESM1_ESM.pdf/9675440)

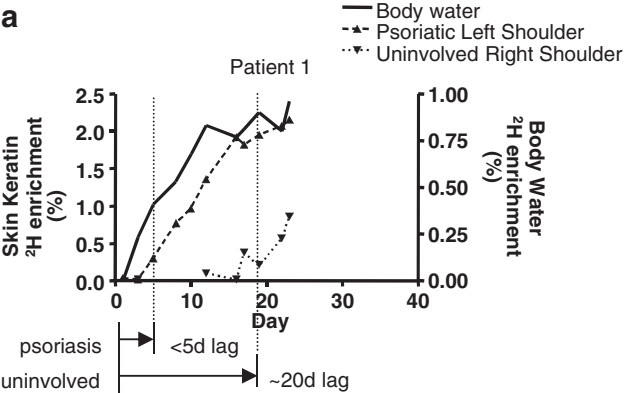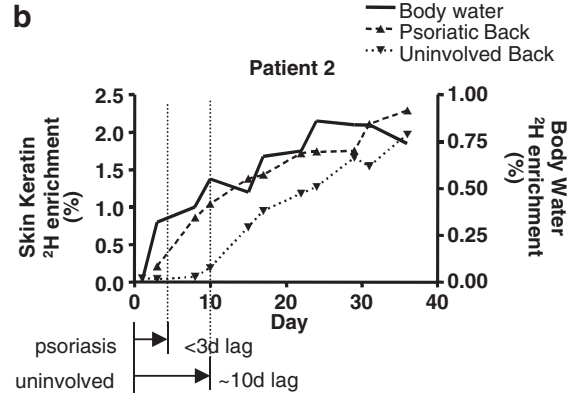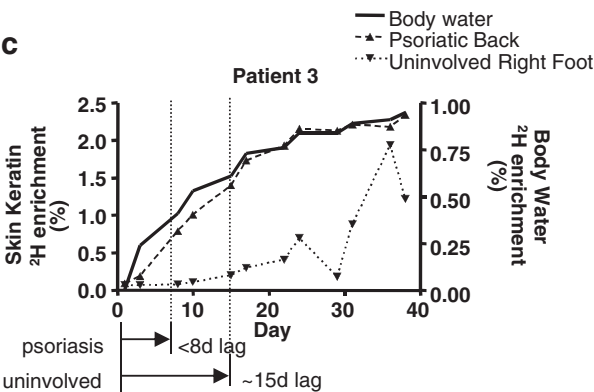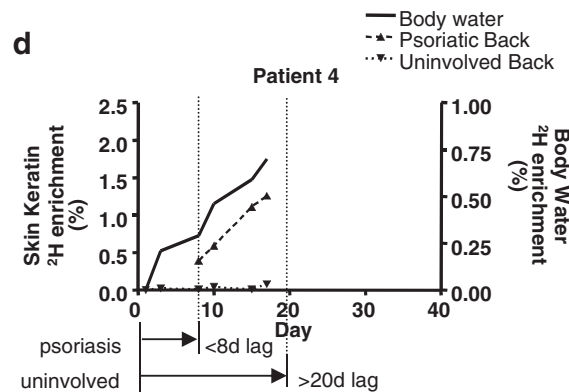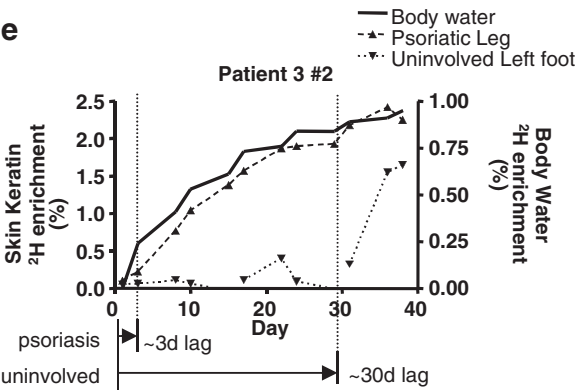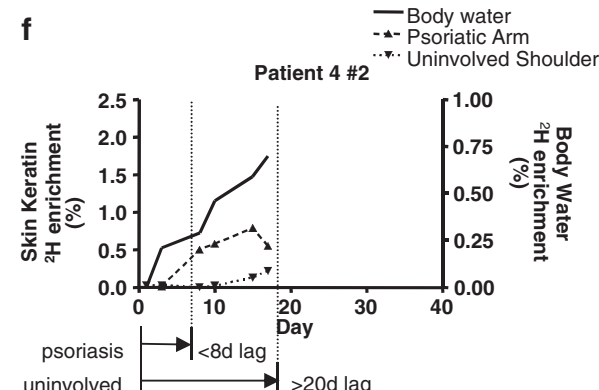

Supplement: MOESM1 [file 9675440]
